# Supplementary material for: An Emergent Nexus between Striae and Thoracic Aortic Dissection
Source: MDPI journal article supplement (doi:10.3390/genes13010023), 2021-12-23
Supplement: s1 [file s1]

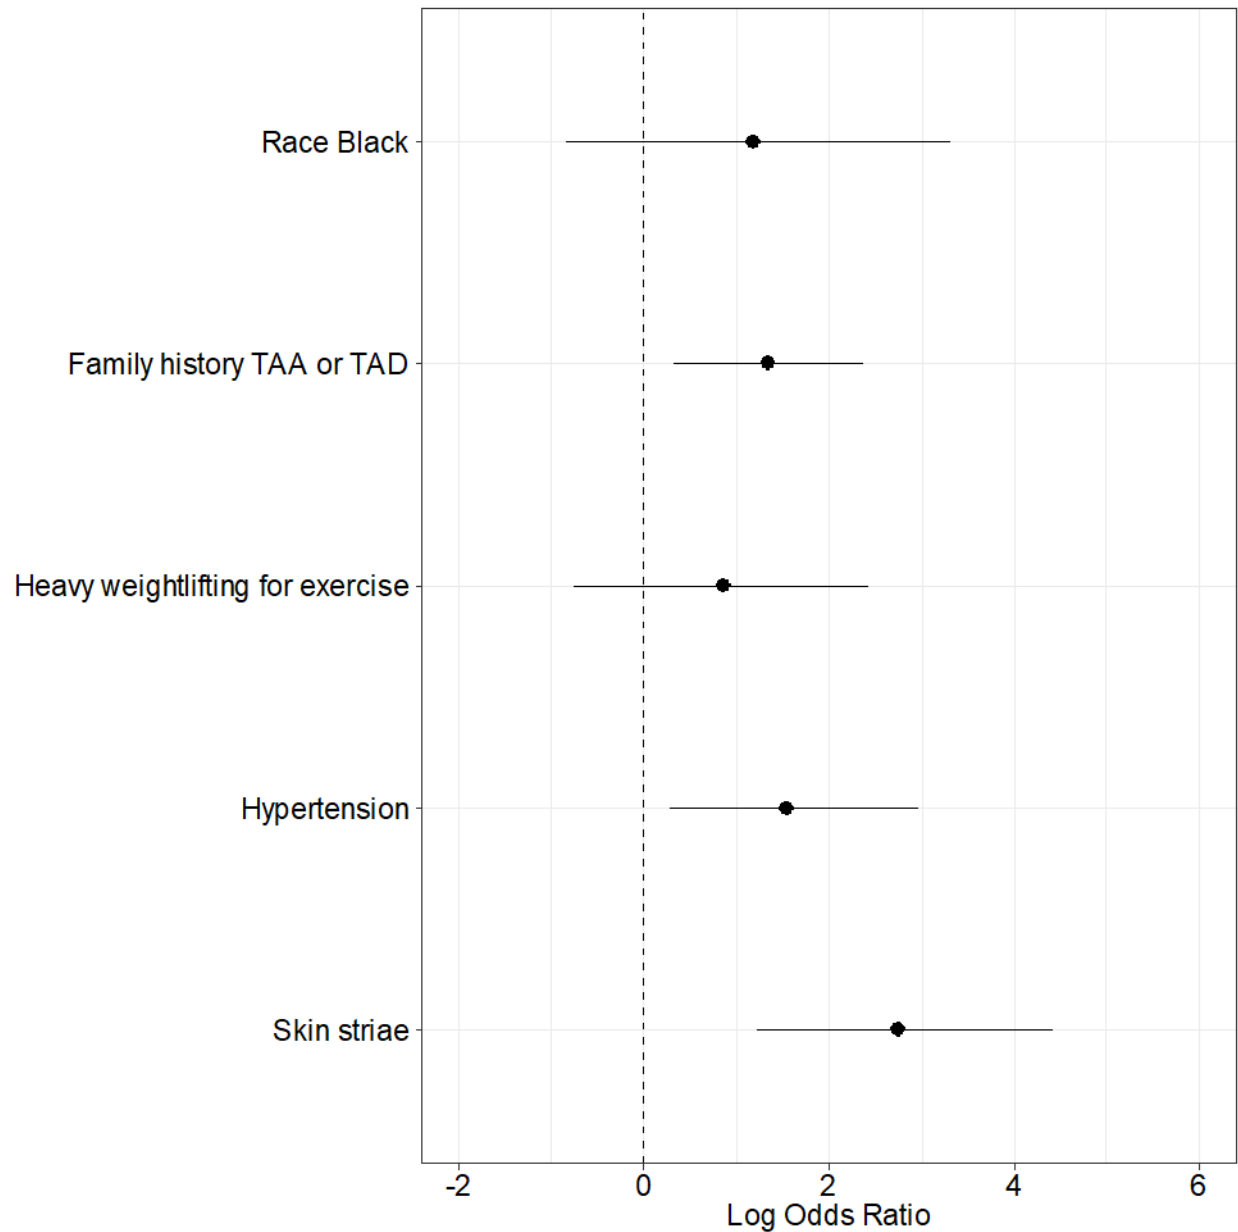

Figure S1. Result of multivariate analysis for characteristics associated with thoracic aortic dissection (TAD) among 223 cases who did not have a clinical diagnosis of Marfan, Loeys-Dietz, vascular Ehlers-Danlos, or Turner syndromes. Odds ratios are estimated through multivariate logistic regression model. Forest plot displays log2 of odd ratios (diamond) and 95% confidence intervals (bar). Skin striae ( $p=0.0004$ ), family history of thoracic aortic aneurysm (TAA) or TAD ( $p=0.010$ ), and hypertension ( $p=0.015$ ) were independently associated with TAD.
