# Supplementary material for: An Emergent Nexus between Striae and Thoracic Aortic Dissection
Source: MDPI journal article supplement (doi:10.3390/genes13010023), 2021-12-23
Supplement: s1 [file s1]

Table S2. Characteristics of study patients with striae in atypical location (N=31), stratified by history of thoracic aortic dissection (TAD) status.

| ID   | TAD | Sex | Age | Race | Genetic eval or testing | Syndrome | Fam Hx TAA or TAD | MVP | Pectus Car/Exc | Scoliosis | PTX | Striae | Systemic point total* | Shoulder striae | Arm striae | Axilla striae | Chest striae | Back striae | Abdomen striae | Flank striae | Diffuse striae |
|------|-----|-----|-----|------|-------------------------|----------|-------------------|-----|----------------|-----------|-----|--------|-----------------------|-----------------|------------|---------------|--------------|-------------|----------------|--------------|----------------|
| 0210 | No  | F   | 38  | B    | Yes                     | MFS      | +                 | +   | -/+            | +         |     | +      | 4                     | +               | +          |               |              |             |                |              |                |
| 0436 | No  | F   | 63  | W    | Yes                     | MFS      | +                 | +   |                | +         |     | +      | 3                     |                 |            |               |              |             |                |              | +              |
| 0714 | No  | M   | 43  | W    | Yes                     | MFS      | +                 |     |                | +         |     | +      | 2                     |                 | +          |               |              | +           | +              |              |                |
| 0131 | No  | M   | 34  | W    | Yes                     | LDS      | +                 |     | +/-            | +         |     | +      | 4                     | +               |            |               |              |             | +              |              |                |
| 0813 | No  | F   | 39  | W    | Yes                     | Stickler |                   |     | +/+            |           |     | +      | 4                     |                 | +          |               | +            | +           |                |              |                |
| 0064 | No  | M   | 60  | W    | No                      | None     |                   |     |                |           |     | +      | 1                     |                 |            |               |              |             | +              |              |                |
| 0226 | No  | M   | 35  | W    | No                      | None     |                   | +   | +/-            | +         |     | +      | 5                     |                 |            |               |              |             | +              |              |                |
| 0290 | No  | M   | 65  | W    | No                      | None     |                   |     | -/+            |           |     | +      | 2                     |                 |            |               |              |             |                | +            |                |
| 0311 | No  | M   | 48  | B    | No                      | None     |                   |     |                |           |     | +      | 1                     |                 | +          |               |              |             | +              |              |                |
| 0333 | No  | M   | 38  | W    | No                      | None     |                   |     |                |           |     | +      | 1                     |                 |            |               |              |             | +              |              |                |
| 0415 | No  | M   | 53  | W    | No                      | None     |                   |     |                |           |     | +      | 1                     |                 |            | +             |              |             | +              |              |                |
| 0012 | Yes | M   | 38  | W    | Yes                     | MFS      |                   |     | +/-            | +         |     | +      | 4                     |                 |            |               |              | +           |                |              |                |
| 0198 | Yes | M   | 31  | W    | Yes                     | MFS      | +                 |     | +/-            |           |     | +      | 3                     | +               |            |               |              |             |                |              |                |
| 0252 | Yes | M   | 38  | W    | Yes                     | MFS      |                   |     |                |           |     | +      | 1                     | +               |            |               |              | +           |                |              |                |
| 0264 | Yes | M   | 41  | W    | Yes                     | MFS      |                   | NA  | +/-            | +         |     | +      | 4                     | +               |            |               | +            |             |                |              |                |
| 0301 | Yes | M   | 33  | W    | Yes                     | MFS      | +                 | +   | -/+            |           |     | +      | 3                     | +               |            |               | +            |             | +              |              |                |
| 0086 | Yes | M   | 67  | W    | No                      | None     | +                 |     |                |           |     | +      | 1                     | +               |            |               |              |             | +              |              |                |
| 0105 | Yes | F   | 55  | B    | Yes                     | None     | +                 |     |                |           |     | +      | 1                     |                 |            |               | +            |             |                |              |                |
| 0114 | Yes | M   | 83  | W    | No                      | None     |                   |     |                |           |     | +      | 1                     |                 | +          |               |              |             |                |              |                |
| 0122 | Yes | M   | 46  | W    | No                      | None     | +                 |     |                |           |     | +      | 1                     |                 |            | +             |              |             | +              |              |                |
| 0141 | Yes | M   | 33  | W    | No                      | None***  | +                 |     |                | +         |     | +      | 2                     |                 |            |               |              |             | +              |              |                |
| 0220 | Yes | M   | 70  | W    | No                      | None     |                   |     |                |           | +   | +      | 3                     |                 |            |               |              |             | +              |              |                |
| 0245 | Yes | M   | 75  | W    | No                      | None     |                   |     |                |           |     | +      | 1                     |                 |            |               |              |             |                |              | +              |
| 0337 | Yes | M   | 39  | B    | NA                      | None     |                   |     | +/-            |           |     | +      | 3                     | +               |            |               |              | +           |                |              |                |
| 0369 | Yes | M   | 24  | W    | Yes                     | None**   |                   |     |                |           |     | +      | 1                     |                 |            |               |              | +           |                |              |                |
| 0445 | Yes | M   | 72  | W    | No                      | None     |                   |     |                |           |     | +      | 1                     |                 |            |               |              |             | +              |              |                |
| 0475 | Yes | M   | 59  | W    | No                      | None     | +                 |     |                |           |     | +      | 1                     |                 | +          |               |              |             |                |              |                |
| 0480 | Yes | F   | 58  | B    | No                      | None     |                   |     |                |           |     | +      | 1                     |                 |            |               |              |             |                |              | +              |
| 0552 | Yes | M   | 71  | W    | No                      | None     |                   |     |                |           |     | +      | 1                     |                 |            |               |              |             | +              |              |                |
| 0573 | Yes | M   | 48  | B    | Yes                     | None     |                   |     | -/+            |           |     | +      | 2                     | +               |            |               |              |             |                |              |                |
| 0753 | Yes | M   | 31  | W    | Yes                     | None     |                   |     |                |           |     | +      | 1                     |                 |            |               | +            |             |                |              |                |

Cases without history of TAD are shaded green and cases with history of TAD are shaded pink.

\*Striae is included in the calculation of revised Ghent systemic points; \*\*Carries likely pathogenic variant in *ACTA2*; \*\*\*May carry a pathogenic variant in *ACTA2* that has been identified in multiple affected relatives.

B=Black or African American; Car=Carinatum; Exc=Excavatum; F=female; Hx=history; LDS=Loeys-Dietz syndrome; M=male; MFS=Marfan syndrome; NA=data not available; PTX=spontaneous pneumothorax; TAA=thoracic aortic aneurysm; W=White
