# Supplementary material for: An Emergent Nexus between Striae and Thoracic Aortic Dissection
Source: MDPI journal article supplement (doi:10.3390/genes13010023), 2021-12-23
Supplement: s1 [file s1]

Table S1. Frequency of characteristics between TAD (N=70) or non-TAD cases (N=153) who did not have an established diagnosis of Marfan, Loeys-Dietz, vascular Ehlers-Danlos, or Turner syndrome.

| Characteristic                        | TAD, N<br>(%)  | No TAD, N<br>(%) | OR [95% CI]           | P value           |
|---------------------------------------|----------------|------------------|-----------------------|-------------------|
| Sex male                              | 51 (73)        | 112 (73)         | 1.0 [0.5-1.9]         | 0.96              |
| <b>Race Black or African American</b> | <b>8 (11)</b>  | <b>4 (3)</b>     | <b>4.8 [1.4-16.5]</b> | <b>0.0068</b>     |
| <b>Family history of TAA or TAD</b>   | <b>24 (34)</b> | <b>25 (16)</b>   | <b>2.7 [1.4-5.1]</b>  | <b>0.0027</b>     |
| <b>Hypertension</b>                   | <b>62 (89)</b> | <b>115 (76)</b>  | <b>2.5 [1.1-5.7]</b>  | <b>0.026</b>      |
| Hyperlipidemia                        | 34 (50)        | 83 (54)          | 0.8 [0.5-1.5]         | 0.56              |
| Obesity (BMI > 30)                    | 29 (43)        | 65 (43)          | 1.0 [0.6-1.8]         | 0.99              |
| Type 2 diabetes mellitus              | 9 (13)         | 19 (12)          | 1.0 [0.4-2.4]         | 0.93              |
| Coronary artery disease               | 21 (30)        | 46 (30)          | 1.0 [0.5-1.8]         | 0.99              |
| Stroke                                | 10 (14)        | 14 (9)           | 1.7 [0.7-3.9]         | 0.25              |
| History of cigarette smoking          | 45 (64)        | 83 (55)          | 1.5 [0.8-2.7]         | 0.18              |
| Heavy weightlifting for exercise      | 10 (15)        | 10 (7)           | 2.4 [1.0-6.2]         | 0.055             |
| Heavy lifting for other activities    | 15 (22)        | 27 (18)          | 1.3 [0.6-2.6]         | 0.47              |
| Mitral valve prolapse                 | 3 (4)          | 6 (4)            | 1.1 [0.3-4.5]         | 0.91              |
| Abdominal hernia                      | 11 (16)        | 33 (22)          | 0.7 [0.3-1.4]         | 0.31              |
| Inguinal                              | 4 (6)          | 24 (16)          |                       |                   |
| Umbilical                             | 7 (10)         | 11 (7)           |                       |                   |
| Femoral                               | 1 (1)          | 1 (1)            |                       |                   |
| <b>Skin striae</b>                    | <b>15 (22)</b> | <b>7 (5)</b>     | <b>5.7 [2.2-14.7]</b> | <b>&lt;0.0001</b> |
| Hyperextensible skin                  | 6 (9)          | 14 (9)           | 1.0 [0.4-2.6]         | 0.90              |
| Hyperflexibility                      | 6 (9)          | 9 (6)            | 1.5 [0.5-4.4]         | 0.46              |

|                     |        |        |               |       |
|---------------------|--------|--------|---------------|-------|
| Scoliosis           | 5 (7)  | 13 (9) | 0.8 [0.3-2.4] | 0.73  |
| Wide atrophic scars | 9 (13) | 9 (6)  | 2.4 [0.9-6.2] | 0.078 |
| Pectus excavatum    | 2 (3)  | 4 (3)  | 1.1 [0.2-6.3] | 0.89  |
| Pectus carinatum    | 2 (3)  | 5 (3)  | 0.9 [0.2-4.8] | 0.91  |

Characteristics with p value < 0.05 are highlighted in bold.

BMI: Body mass index; CI: Confidence interval; OR: odds ratio.
